# Supplementary material for: Heparin-Based Hydrogel Micropatches with Human Adipose-Derived Stem Cells: A Promising Therapeutic Approach for Neuropathic Pain Relief
Source: MDPI journal article supplement (doi:10.3390/biomedicines11051436), 2023-05-12
Supplement: s1 [file s1]

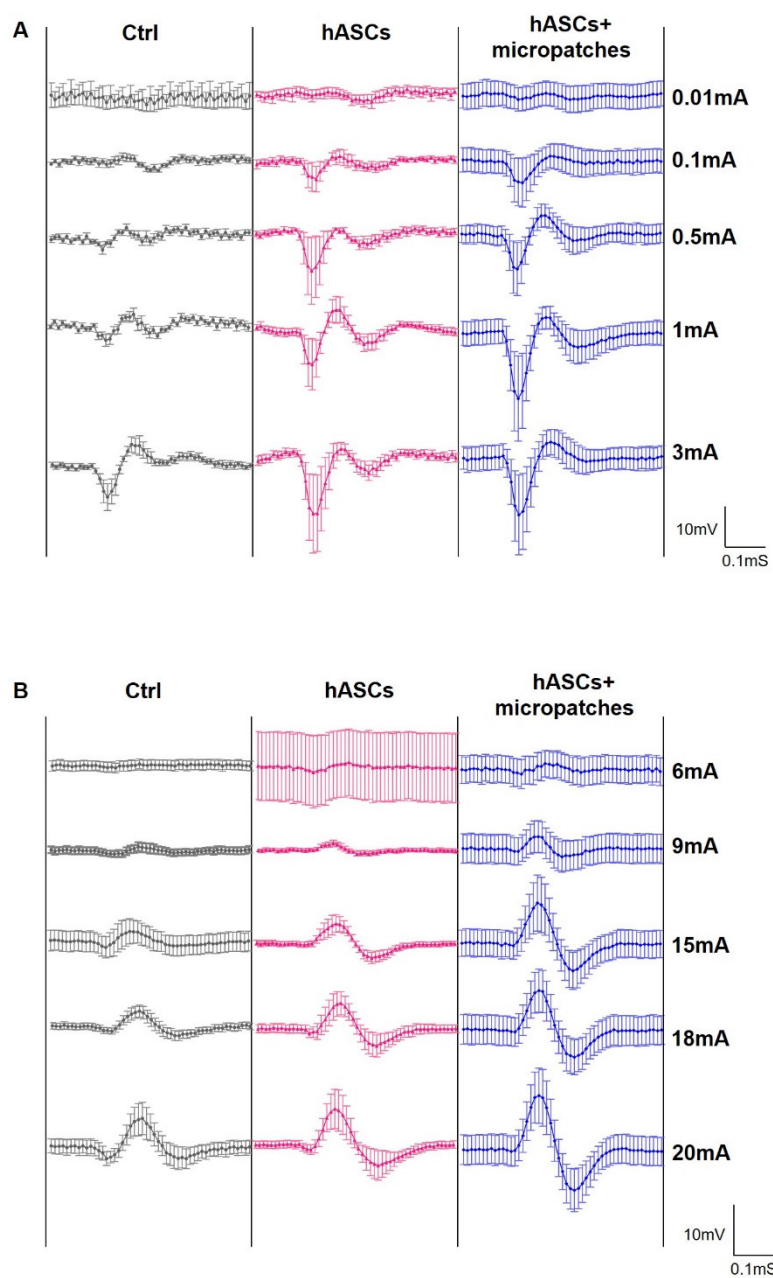

**Figure S1.** Records of MEP and SSEP by input. **(A)** SSEP signals by group from 0.01mV input to 3mA at 4 weeks after transplantation. **(B)** MEP signals by group from 6mA input to 20mA at 4 weeks after transplantation.
